# Supplementary material for: Cryptotanshinone interferes with chondrocyte apoptosis in osteoarthritis by inhibiting the expression of miR-574-5p
Source: PubMed Central journal article supplement — Mol Med Rep. 2021 Apr 7;23(6):424. doi: 10.3892/mmr.2021.12063 (PMC8047883; doi:10.3892/mmr.2021.12063), 2021-04-07

Figure S1. Bilateral paw withdrawal threshold of OA group.  
\*\*\*P<0.001 vs. Sham group; ###P<0.001 vs. OA-ipsilateral group. OA, osteoarthritis; ns, not significant.

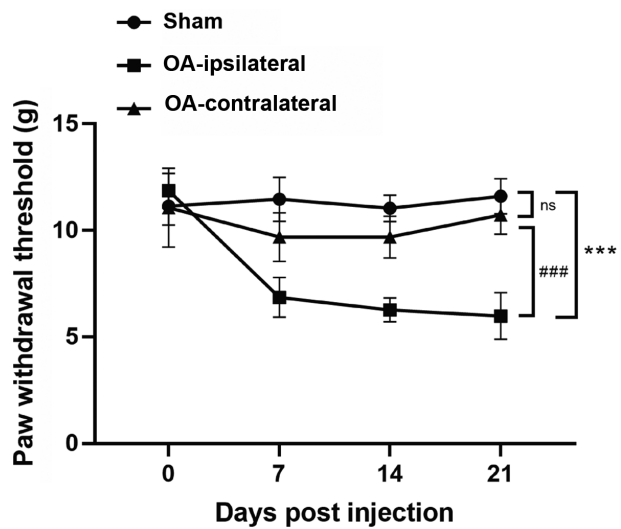

Figure S2. Validation of YAF2 expression using a luciferase assay. \*\*P<0.01 vs. Luc-NC; ##P<0.01 vs. Luc-WT-YAF2. Luc, luciferase; NC, negative control; WT, wild-type; MUT, mutant; YAF2, YY1-associated factor 2; F, forward; R, reverse.

| PCR Primer |                                                              |
|------------|--------------------------------------------------------------|
| WT-YAF2    | F:5'-UAUUUCGG <b>CCACUC</b> A-3'<br>R:5'-ATGAAACGAACTGCAT-3' |
| MUT-YAF2   | F:5'-UAUUUCGG <b>GGUGAGA</b> -3'<br>R:5'-ATGAAACGAACTGCAT-3' |

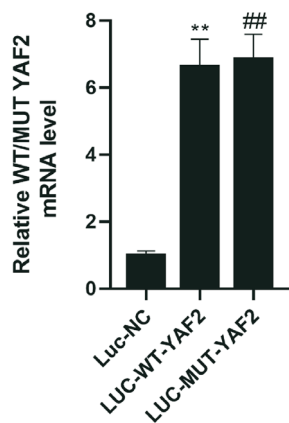

Figure S3. mRNA expression levels of miR-574-5p and YAF2 after cell transfection with miR-574-5p mimic and pcDNA-YAF2.  $^{##}P < 0.01$  vs. mimic-NC;  $^{###}P < 0.01$  vs. pc-DNA. NC, negative control; YAF2, YY1-associated factor 2; miR, microRNA.

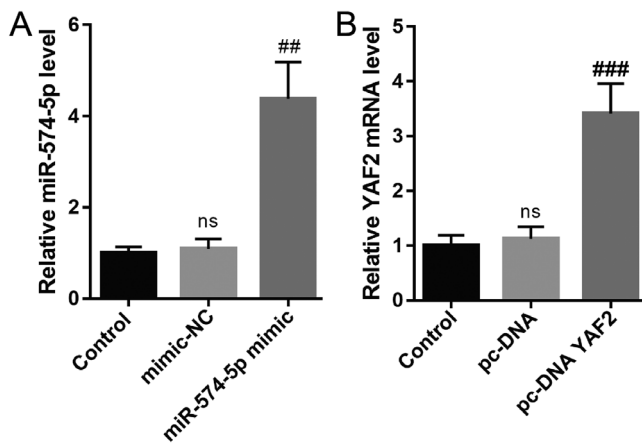

Supplement: Supplementary_Data.pdf [file Supplementary_Data.pdf]
